# Supplementary material
Source: PubMed Central journal article supplement (PMC9041815)
Supplement: NIHMS1789892-supplement-Supplementary_table_1.pdf [file NIHMS1789892-supplement-Supplementary_table_1.pdf]

**SUPPLEMENTARY TABLE 1. FPR RATES**

| <b>AUTHORS, YEAR</b>                      | <b>FPR Definition</b> | <b>no of patients of FPR</b> | <b>Total no of patients in study</b> | <b>thrombectomy technique</b> | <b>Study Design ( R:Retrospective, P:Prospective)</b> | <b>Revascularization grading [Core lab (c) or site adjudicated (S)]</b> |
|-------------------------------------------|-----------------------|------------------------------|--------------------------------------|-------------------------------|-------------------------------------------------------|-------------------------------------------------------------------------|
| <b>KARA ET AL, 2019<sup>35</sup></b>      | 2b                    | 23                           | 61                                   | Stent-retriever               | R                                                     | C                                                                       |
| <b>HAUSSEN ET AL, 2018<sup>36</sup></b>   | 2b                    | 239                          | 420                                  | Stent-retriever               | R                                                     | C                                                                       |
| <b>KANNATH ET AL, 2018<sup>40</sup></b>   | 2b                    | 24                           | 40                                   | Stent-retriever               | R                                                     | C                                                                       |
| <b>WONG ET AL, 2017<sup>48</sup></b>      | 2b                    | 20                           | 33                                   | Stent-retriever               | R                                                     | C                                                                       |
| <b>CLARENCON ET AL, 2019<sup>38</sup></b> | 2b                    | 12                           | 22                                   | Stent-retriever               | R                                                     | C                                                                       |
| <b>CHIVOT ET AL, 2020<sup>14</sup></b>    | 2b                    | 50                           | 85                                   | Aspiration                    | R                                                     | C                                                                       |
| <b>KIM ET AL, 2019<sup>41</sup></b>       | 2b                    | 49                           | 116                                  | Stent-retriever               | R                                                     | C                                                                       |
| <b>WON KIM ET AL, 2019<sup>32</sup></b>   | 2b                    | 69                           | 189                                  | Aspiration                    | R                                                     | C                                                                       |
| <b>SHENG LIU ET AL, 2019<sup>42</sup></b> | 2b                    | 50                           | 108                                  | Stent-retriever               | R                                                     | C                                                                       |
| <b>KAMMERER ET AL, 2019<sup>39</sup></b>  | 2b                    | 110                          | 170                                  | Stent-retriever               | R                                                     | C                                                                       |
| <b>XING ET AL, 2020<sup>30</sup></b>      | 2b                    | 15                           | 69                                   | Stent-retriever               | R                                                     | C                                                                       |
| <b>XING ET AL, 2020<sup>30</sup></b>      | 2b                    | 10                           | 40                                   | Aspiration                    | R                                                     | C                                                                       |
| <b>BERNAVA ET AL, 2019<sup>13</sup></b>   | 2b                    | 57                           | 85                                   | Aspiration                    | R                                                     | C                                                                       |
| <b>LOH ET AL, 2010<sup>43</sup></b>       | 2b                    | 37                           | 97                                   | Stent-retriever               | P                                                     | C                                                                       |
| <b>MAUS ET AL, 2017<sup>54</sup></b>      | 2b                    | 28                           | 32                                   | Combination                   | R                                                     | C                                                                       |
| <b>YE ET AL, 2019<sup>31</sup></b>        | 2b                    | 7                            | 21                                   | Stent-retriever               | R                                                     | C                                                                       |
| <b>YE ET AL, 2019<sup>31</sup></b>        | 2b                    | 6                            | 26                                   | Aspiration                    | R                                                     | C                                                                       |
| <b>YE ET AL, 2019<sup>31</sup></b>        | 2b                    | 7                            | 17                                   | Combination                   | R                                                     | C                                                                       |
| <b>ALAWIEH ET AL, 2018<sup>10</sup></b>   | 2b                    | 303                          | 493                                  | Aspiration                    | R                                                     | C                                                                       |
| <b>TOMASELLO ET AL, 2019<sup>27</sup></b> | 2b                    | 80                           | 154                                  | Stent-retriever               | R                                                     | S                                                                       |
| <b>TOMASELLO ET AL, 2019<sup>27</sup></b> | 2b                    | 17                           | 39                                   | Aspiration                    | R                                                     | S                                                                       |
| <b>COLBY ET AL, 2019<sup>15</sup></b>     | 2b                    | 77                           | 215                                  | Stent-retriever               | R                                                     | C                                                                       |
| <b>COLBY ET AL, 2019<sup>15</sup></b>     | 2b                    | 11                           | 32                                   | Aspiration                    | R                                                     | C                                                                       |
| <b>COLBY ET AL, 2019<sup>15</sup></b>     | 2b                    | 59                           | 106                                  | Combination                   | R                                                     | C                                                                       |
| <b>TELEB, 2019<sup>47</sup></b>           | 2b                    | 33                           | 52                                   | Stent-retriever               | R                                                     | C                                                                       |
| <b>TONETTI ET AL, 2018<sup>34</sup></b>   | 2b                    | 75                           | 180                                  | Aspiration                    | R                                                     | C                                                                       |
| <b>SCHRAMM ET AL, 2018<sup>25</sup></b>   | 2b                    | 90                           | 204                                  | Aspiration                    | p                                                     | C                                                                       |
| <b>ZAIDAT ET AL,</b>                      | 2b                    | 119                          | 200                                  | Stent-retriever               | R                                                     | C                                                                       |

|                                                   |    |     |      |                                   |   |   |
|---------------------------------------------------|----|-----|------|-----------------------------------|---|---|
| <b>2019<sup>51</sup></b>                          |    |     |      |                                   |   |   |
| <b>Z Aidat et al, 2019<sup>51</sup></b>           | 2b | 185 | 269  | Stent-retriever                   | R | C |
| <b>Z Aidat et al, 2019<sup>51</sup></b>           | 2b | 126 | 242  | Stent-retriever                   | R | C |
| <b>Z Aidat et al, 2018<sup>50</sup></b>           | 2b | 117 | 227  | Stent-retriever                   | R | C |
| <b>T Turk et al, 2019<sup>28</sup></b>            | 2b | 65  | 136  | Stent-retriever                   | P | C |
| <b>T Turk et al, 2019<sup>28</sup></b>            | 2b | 75  | 134  | Aspiration                        | P | C |
| <b>J Indal et al, 2019<sup>6</sup></b>            | 2b | 60  | 205  | Aspiration and/or Stent-retriever | R | C |
| <b>B Bai et al, 2018<sup>37</sup></b>             | 2b | 149 | 472  | Stent-retriever                   | R | C |
| <b>S Seker et al, 2018<sup>46</sup></b>           | 2b | 97  | 100  | Stent-retriever                   |   |   |
| <b>A Allmouhi et al, 2020<sup>57</sup></b>        | 2b | 733 | 1867 | Aspiration and/or Stent-retriever | p | C |
| <b>A Alawieh et al, 2019<sup>10</sup></b>         | 2b | 107 | 194  | Aspiration                        | R | C |
| <b>G Giuseppe Romano et al, 2019<sup>24</sup></b> | 2b | 325 | 362  | Aspiration                        | R | C |
| <b>G Gross et al, 2019<sup>17</sup></b>           | 2b | 22  | 49   | Aspiration                        | R | C |
| <b>R Raymond et al, 2019<sup>23</sup></b>         | 2b | 36  | 92   | Aspiration                        | P | C |
| <b>T Tekle et al, 2019<sup>52</sup></b>           | 2b | 35  | 107  | Stent-retriever                   | R | C |
| <b>F Flottmann et al, 2018<sup>3</sup></b>        | 2b | 151 | 330  | Stent-retriever                   | R | C |
| <b>T Tornel et al, 2019<sup>62</sup></b>          | 2b | 213 | 542  | Aspiration and/or Stent-retriever | R | C |
| <b>H Hyun Baek et al, 2017<sup>66</sup></b>       | 2b | 68  | 165  | Stent-retriever                   | R | C |
| <b>A Anadani et al, 2019<sup>11</sup></b>         | 2b | 178 | 524  | Aspiration                        | P | C |
| <b>Z Iadat et al, 2018<sup>4</sup></b>            | 2b | 132 | 354  | Stent-retriever                   | R | S |
| <b>D Delgado, 2018<sup>33</sup></b>               | 2b | 64  | 152  | Aspiration                        | R | C |
| <b>W Wang et al, 2019<sup>29</sup></b>            | 2b | 21  | 56   | Aspiration                        | R | C |
| <b>K Kleine et al, 2016<sup>59</sup></b>          | 2b | 68  | 352  | Aspiration and/or Stent-retriever | R | C |
| <b>M Mohammaden et al, 2020<sup>60</sup></b>      | 2b | 202 | 563  | Aspiration and/or Stent-retriever | R | C |
| <b>H Hwan Kim et al, 2020<sup>55</sup></b>        | 2b | 49  | 91   | Combination                       | R | C |
| <b>G Gengfan Ye et al, 2020<sup>49</sup></b>      | 2b | 18  | 52   | Aspiration and/or Stent-          | R | C |

|                                                    |    |     |     |                                   |   |   |
|----------------------------------------------------|----|-----|-----|-----------------------------------|---|---|
|                                                    |    |     |     | retriever                         |   |   |
| <b>MOKIN ET AL, 2020<sup>22</sup></b>              | 2b | 55  | 81  | Aspiration                        | R | C |
| <b>MOKIN ET AL, 2020<sup>22</sup></b>              | 2b | 44  | 84  | Stent-retriever                   | R | C |
| <b>BAHARVAHDAT ET AL, 2020<sup>12</sup></b>        | 2b | 7   | 19  | Aspiration                        | R | C |
| <b>BAHARVAHDAT ET AL, 2020<sup>12</sup></b>        | 2b | 59  | 154 | Stent-retriever                   | R | C |
| <b>BAHARVAHDAT ET AL, 2020<sup>12</sup></b>        | 2b | 50  | 87  | Combination                       | R | C |
| <b>AKPINAR ET AL, 2020<sup>5</sup></b>             | 2b | 67  | 118 | Stent-retriever                   | R | S |
| <b>KAISER ET AL, 2020<sup>19</sup></b>             | 2b | 75  | 155 | Aspiration                        | R | C |
| <b>KAISER ET AL, 2020<sup>19</sup></b>             | 2b | 21  | 48  | Stent-retriever                   | R | C |
| <b>DROUAD DE-ROUSIERS ET AL, 2018<sup>68</sup></b> | 2b | 53  | 124 | Aspiration and/or Stent-retriever | R | S |
| <b>HYUN BAEK ET AL, 2018<sup>53</sup></b>          | 2b | 174 | 467 | Stent-retriever                   | R | C |
| <b>XING ET AL, 2020<sup>30</sup></b>               | 2c | 12  | 69  | Stent-retriever                   | R | C |
| <b>XING ET AL, 2020<sup>30</sup></b>               | 2c | 10  | 40  | Aspiration                        | R | C |
| <b>YE ET AL, 2019<sup>31</sup></b>                 | 2c | 6   | 21  | Stent-retriever                   | R | C |
| <b>YE ET AL, 2019<sup>31</sup></b>                 | 2c | 5   | 26  | Aspiration                        | R | C |
| <b>YE ET AL, 2019<sup>31</sup></b>                 | 2c | 6   | 17  | Combination                       | R | C |
| <b>TOMASELLO ET AL, 2019<sup>27</sup></b>          | 2c | 61  | 154 | Stent-retriever                   | R | S |
| <b>TOMASELLO ET AL, 2019<sup>27</sup></b>          | 2c | 13  | 39  | Aspiration                        | R | S |
| <b>ZAIDAT ET AL, 2019<sup>51</sup></b>             | 2c | 82  | 200 | Stent-retriever                   | R | C |
| <b>ZAIDAT ET AL, 2019<sup>51</sup></b>             | 2c | 131 | 269 | Stent-retriever                   | R | C |
| <b>ZAIDAT ET AL, 2019<sup>51</sup></b>             | 2c | 86  | 242 | Stent-retriever                   | R | C |
| <b>ZAIDAT ET AL, 2018<sup>50</sup></b>             | 2c | 91  | 227 | Stent-retriever                   | R | C |
| <b>JINDAL ET AL, 2019<sup>6</sup></b>              | 2c | 45  | 205 | Aspiration and/or Stent-retriever | R | C |
| <b>MOKIN ET AL, 2020<sup>7</sup></b>               | 2c | 140 | 609 | Stent-retriever                   | R | S |
| <b>DUCROUX ET AL, 2019<sup>16</sup></b>            | 2c | 53  | 336 | Stent-retriever                   | P | C |
| <b>DUCROUX ET AL, 2019<sup>16</sup></b>            | 2c | 44  | 336 | Aspiration                        | P | C |

|                                                  |    |     |     |                                   |   |   |
|--------------------------------------------------|----|-----|-----|-----------------------------------|---|---|
| <b>ANADANI ET AL, 2019<sup>11</sup></b>          | 2c | 156 | 524 | Aspiration                        | R | C |
| <b>HUN KANG ET AL, 2019<sup>65</sup></b>         | 2c | 66  | 429 | Aspiration                        | R | C |
| <b>NIKOS PSYCHOGIOS ET AL, 2019<sup>45</sup></b> | 2c | 17  | 20  | Stent-retriever                   | R | C |
| <b>GENGFAN YE ET AL, 2020<sup>49</sup></b>       | 2c | 15  | 52  | Aspiration and/or Stent-retriever | R | C |
| <b>MOKIN ET AL, 2020<sup>22</sup></b>            | 2c | 34  | 81  | Aspiration                        | R | C |
| <b>MOKIN ET AL, 2020<sup>22</sup></b>            | 2c | 33  | 84  | Stent-retriever                   | R | C |
| <b>MARNET ET AL, 2019<sup>21</sup></b>           | 3  | 71  | 296 | Aspiration                        | R | C |
| <b>KOWOLL ET AL, 2014<sup>20</sup></b>           | 3  | 14  | 30  | Aspiration                        | R | C |
| <b>CAROLIA HESSE ET AL, 2018<sup>19</sup></b>    | 3  | 14  | 102 | Stent-retriever                   | R | C |
| <b>CAROLIA HESSE ET AL, 2018<sup>19</sup></b>    | 3  | 28  | 161 | Aspiration                        | R | C |
| <b>CAROLIA HESSE ET AL, 2018<sup>19</sup></b>    | 3  | 47  | 184 | Combination                       | R | C |
| <b>TELEB, 2019<sup>47</sup></b>                  | 3  | 24  | 52  | Stent-retriever                   | R | C |
| <b>HANDSHOE ET AL, 2020<sup>58</sup></b>         | 3  | 90  | 247 | Aspiration and/or Stent-retriever | R | C |
| <b>NGUYEN ET AL, 2019<sup>44</sup></b>           | 3  | 117 | 536 | Stent-retriever                   | R | S |
| <b>SRIVATSA ET AL, 2019<sup>27</sup></b>         | 3  | 6   | 15  | Stent-retriever                   | R | C |
| <b>SRIVATSA ET AL, 2019<sup>26</sup></b>         | 3  | 24  | 30  | Aspiration                        | R | C |
| <b>SRIVATSA ET AL, 2019<sup>26</sup></b>         | 3  | 5   | 28  | Combination                       | R | C |
| <b>TORNEL ET AL, 2019<sup>62</sup></b>           | 3  | 135 | 542 | Aspiration and/or Stent-retriever | R | C |
| <b>NIKOUBASHMAN ET AL, 2019<sup>61</sup></b>     | 3  | 62  | 164 | Aspiration and/or Stent-retriever | R | C |
| <b>KLEINE ET AL, 2016<sup>59</sup></b>           | 3  | 64  | 352 | Aspiration and/or Stent-retriever | R | C |
| <b>NIKOS PSYCHOGIOS ET AL, 2019<sup>45</sup></b> | 3  | 13  | 20  | Stent-retriever                   | R | C |
| <b>AKPINAR ET AL, 2020<sup>5</sup></b>           | 3  | 53  | 118 | Stent-retriever                   | R | S |

|                                          |    |     |      |                                   |   |   |
|------------------------------------------|----|-----|------|-----------------------------------|---|---|
| <b>GONZALEZ ET AL, 2020<sup>56</sup></b> | 3  | 102 | 210  | Aspiration and/or Stent-retriever | R | C |
| <b>KAISER ET AL, 20<sup>19</sup></b>     | 3  | 51  | 155  | Aspiration                        | R | C |
| <b>KAISER ET AL, 2020<sup>19</sup></b>   | 3  | 10  | 48   | Stent-retriever                   | R | C |
| <b>DI MARIA ET AL, 2020<sup>63</sup></b> | 2c | 417 | 1832 | Aspiration and/or Stent-retriever | R | C |

FPR=first pass revascularization
