# Supplementary material
Source: PubMed Central journal article supplement (PMC9041815)
Supplement: NIHMS1789892-supplement-Supplementary_table_2.pdf [file NIHMS1789892-supplement-Supplementary_table_2.pdf]

**SUPPLEMENTARY TABLE 2.MRS 90 DAYS**

| <b>AUTHORS, YEAR</b>                                     | <b>FPR<br/>Definition</b> | <b>FPR</b> | <b>FPR-<br/>Total</b> | <b>non-<br/>FPR</b> | <b>non-<br/>FPR<br/>Total</b> | <b>thrombectomy<br/>technique</b>        | <b>note</b>                     |
|----------------------------------------------------------|---------------------------|------------|-----------------------|---------------------|-------------------------------|------------------------------------------|---------------------------------|
| <b>MOKIN ET AL,<br/>2020<sup>7</sup></b>                 | 2c                        | 77         | 122                   | 177                 | 398                           | Stent-retriever                          |                                 |
| <b>DUCROUX ET AL,<br/>2019<sup>16</sup></b>              | 2c                        | 56         | 93                    | 100                 | 229                           | Aspiration and/or Stent-retriever        |                                 |
| <b>HYUN BAEK ET<br/>AL, 2017<sup>66</sup></b>            | 2b                        | 44         | 68                    | 28                  | 68                            | Stent-retriever                          |                                 |
| <b>ZAIDAT ET AL,<br/>2018<sup>4</sup></b>                | 2b                        | 71         | 133                   | 83                  | 235                           | Stent-retriever                          |                                 |
| <b>WANG ET AL,<br/>2019<sup>29</sup></b>                 | 2b                        | 14         | 21                    | 17                  | 35                            | Stent-retriever                          |                                 |
| <b>KLEINE ET AL,<br/>2016<sup>59</sup></b>               | 2b                        | 48.8       | 100                   | 35.6                | 100                           | Aspiration and/or Stent-retriever        |                                 |
| <b>NIKOS<br/>PSYCHOGIOS ET<br/>AL, 2019<sup>45</sup></b> | 3                         | 6          | 13                    | 1                   | 1                             | Stent-retriever                          |                                 |
| <b>NIKOS<br/>PSYCHOGIOS ET<br/>AL, 2019<sup>45</sup></b> | 2c                        | 7          | 17                    | 1                   | 1                             | Stent-retriever                          |                                 |
| <b>MOHAMMADEN<br/>ET AL, 2020<sup>60</sup></b>           | 2b                        | 126        | 202                   | 188                 | 361                           | Aspiration and/or Stent-retriever        |                                 |
| <b>ALMALLOUHI ET<br/>AL, 2020<sup>57</sup></b>           | 2b                        | 733        |                       |                     | 1134                          | Aspiration<br>and/or Stent-<br>retriever | OR: 1.6--<br>1.1-2.3<br>P=0.008 |
| <b>AKPINAR ET AL,<br/>2020<sup>5</sup></b>               | 2b                        | 35         | 67                    | 50                  | 118                           | Aspiration and/or Stent-retriever        |                                 |
| <b>KAISER ET AL,<br/>2020<sup>19</sup></b>               | 3                         | 27         | 59                    | 42                  | 142                           | Aspiration                               |                                 |
| <b>DI MARIA ET AL,<br/>2020<sup>63</sup></b>             | 2c                        | 211        | 417                   | 551                 | 1415                          | Aspiration and/or Stent-retriever        |                                 |

FPR=first pass revascularization
