# Supplementary material
Source: PubMed Central journal article supplement (PMC9041815)
Supplement: NIHMS1789892-supplement-Supplementary_table_3.pdf [file NIHMS1789892-supplement-Supplementary_table_3.pdf]

**SUPPLEMENTARY TABLE 3. SICH**

| <b>AUTHORS, YEAR</b>                       | <b>FPR DEFINITION</b> | <b>SICH DEFINITION</b>                                                                                                                                  | <b>FPR</b> | <b>FPR-TOTAL</b> | <b>NON-FPR</b> | <b>NON-FPR TOTAL</b> | <b>THROMBECTOMY TECHNIQUE</b>     |
|--------------------------------------------|-----------------------|---------------------------------------------------------------------------------------------------------------------------------------------------------|------------|------------------|----------------|----------------------|-----------------------------------|
| <b>MOHAMMADEN ET AL, 2020<sup>60</sup></b> | 2b                    | Not provided                                                                                                                                            | 8          | 202              | 17             | 361                  | Aspiration and/or Stent-retriever |
| <b>Z Aidat et al, 2018<sup>4</sup></b>     | 2b                    | any intracranial hemorrhage associated with neurological deterioration of $\geq 4$ points on the NIHSS score at 24 hours                                | 5          | 43               | 30             | 309                  | Stent-retriever                   |
| <b>Ducroux et al, 2019<sup>16</sup></b>    | 2c                    | any ICH visualized on follow-up imaging study and associated with a four-point or more worsening on the NIHSS or that resulted in death                 | 5          | 96               | 14             | 234                  | Aspiration and/or Stent-retriever |
| <b>Mokin et al, 2020<sup>7</sup></b>       | 2c                    | any parenchymal hematoma, subarachnoid hemorrhage, or intraventricular hemorrhage associated with worsening of the NIHSS score by 4 points within 24 h. | 9          | 138              | 35             | 469                  | Aspiration and/or Stent-retriever |
| <b>Di Maria et al, 2020<sup>63</sup></b>   | 2c                    | Not provided                                                                                                                                            | 14         | 417              | 340            | 1415                 | Aspiration and/or Stent-retriever |

FPR:First pass revascularization; sICH: symptomatic intracranial hemorrhage.
