# Supplementary material
Source: PubMed Central journal article supplement (PMC9041815)
Supplement: NIHMS1789892-supplement-Supplementary_table_4.pdf [file NIHMS1789892-supplement-Supplementary_table_4.pdf]

**SUPPLEMENTARY TABLE 4. MORTALITY RATE**

| <b>AUTHORS, YEAR</b>                       | <b>FPR<br/>Definition</b> | <b>FPR</b> | <b>FPR-<br/>Total</b> | <b>non-<br/>FPR</b> | <b>non-FPR<br/>Total</b> | <b>thrombectomy<br/>technique</b> |
|--------------------------------------------|---------------------------|------------|-----------------------|---------------------|--------------------------|-----------------------------------|
| <b>MOHAMMADEN ET AL, 2020<sup>60</sup></b> | 2b                        | 27         | 202                   | 50                  | 361                      | Aspiration and/or Stent-retriever |
| <b>ZAIDAT ET AL, 2018<sup>4</sup></b>      | 2b                        | 13         | 42                    | 82                  | 273                      | Stent-retriever                   |
| <b>ZAIDAT ET AL, 2018<sup>4</sup></b>      | 3                         | 13         | 80                    | 82                  | 273                      | Stent-retriever                   |
| <b>DUCROUX ET AL, 2019<sup>16</sup></b>    | 2c                        | 12         | 93                    | 50                  | 229                      | Aspiration and/or Stent-retriever |
| <b>MOKIN ET AL, 2020<sup>7</sup></b>       | 2c                        | 23         | 122                   | 81                  | 398                      | Aspiration and/or Stent-retriever |
| <b>KAISER ET AL, 2020<sup>19</sup></b>     | 3                         | 12         | 59                    | 39                  | 142                      | Aspiration                        |
| <b>DI MARIA ET AL, 2020<sup>63</sup></b>   | 2c                        | 69         | 417                   | 358                 | 1415                     | Aspiration and/or Stent-retriever |

FPR=First pass revascularization
