# Supplementary material
Source: PubMed Central journal article supplement (PMC9041815)
Supplement: NIHMS1789892-supplement-Supplementary_table_5.pdf [file NIHMS1789892-supplement-Supplementary_table_5.pdf]

**SUPPLEMENTARY TABLE 5. MRS 90 DAYS (FPR VS RECANALIZED NON-FPR)**

| <b>AUTHORS, YEAR</b>                                | <b>FPR Definition</b> | <b>FPR</b> | <b>FPR-Total</b> | <b>non-FPR</b> | <b>non-FPR Total</b> | <b>thrombectomy technique</b>     | <b>note</b> |
|-----------------------------------------------------|-----------------------|------------|------------------|----------------|----------------------|-----------------------------------|-------------|
| <b>FLOTTMANN ET AL, 2018<sup>3</sup></b>            | 2b                    | 28         | 73               | 12             | 57                   | Stent-retriever                   |             |
| <b>TORNEL ET AL, 2019<sup>62</sup></b>              | 2b                    | 123        | 213              | 107            | 246                  | Aspiration and/or Stent-retriever |             |
| <b>NKIOUBASHMAN ET AL, 2019<sup>61</sup></b>        | 3                     | 34         | 55               | 33             | 82                   | Aspiration and/or Stent-retriever |             |
| <b>ANADANI ET AL, 2019<sup>11</sup></b>             | 2b                    | 95         | 178              | 122            | 302                  | Aspiration                        |             |
| <b>ANADANI ET AL, 2019<sup>11</sup></b>             | 2c                    | 83         | 156              | 83             | 189                  | Aspiration                        |             |
| <b>ZAIDAT ET AL, 2018<sup>4</sup></b>               | 2b                    | 22         | 43               | 25             | 63                   | Stent-retriever                   |             |
| <b>ZAIDAT ET AL, 2018<sup>4</sup></b>               | 3                     | 49         | 80               | 23             | 52                   | Stent-retriever                   |             |
| <b>HUN KANG ET AL, 2019<sup>65</sup></b>            | 2c                    | 53         | 66               | 170            | 278                  | Aspiration                        |             |
| <b>MOHAMMADEN ET AL, 2020<sup>67</sup></b>          | 2c                    | 104        | 167              | 60             | 113                  | Aspiration and/or Stent-retriever |             |
| <b>DROUARD-DE ROUSIERS ET AL, 2019<sup>68</sup></b> | 2b                    | 16         | 53               | 7              | 38                   | Aspiration and/or Stent-retriever |             |
| <b>HYUN BAEK ET AL, 2018<sup>53</sup></b>           | 2b                    | 103        | 174              | 116            | 210                  | Stent-retriever                   |             |

FPR=first pass revascularization
