# Supplementary material
Source: PubMed Central journal article supplement (PMC9041815)
Supplement: NIHMS1789892-supplement-Supplementary_table_6.pdf [file NIHMS1789892-supplement-Supplementary_table_6.pdf]

**SUPPLEMENTARY TABLE 6. sICH (FPR vs REcanalized non-FPR)**

| <b>AUTHORS, YEAR</b>                       | <b>FPR DEFINITION</b> | <b>sICH DEFINITION</b>                                                                                                   | <b>FPR</b> | <b>FPR-TOTAL</b> | <b>NON-FPR</b> | <b>NON-FPR TOTAL</b> | <b>THROMBECTOMY TECHNIQUE</b>     |
|--------------------------------------------|-----------------------|--------------------------------------------------------------------------------------------------------------------------|------------|------------------|----------------|----------------------|-----------------------------------|
| <b>MOHAMMADEN ET AL, 2020<sup>67</sup></b> | 2c                    | Not provided                                                                                                             | 5          | 167              | 5              | 113                  | Aspiration and/or Stent-retriever |
| <b>TORNEL ET AL, 2019<sup>62</sup></b>     | 2b                    | Not provided                                                                                                             | 11         | 213              | 16             | 246                  | Aspiration                        |
| <b>Z Aidat ET AL, 2018<sup>4</sup></b>     | 2b                    | any intracranial hemorrhage associated with neurological deterioration of $\geq 4$ points on the NIHSS score at 24 hours | 5          | 43               | 9              | 70                   | Stent-retriever                   |
| <b>HUN KANG ET AL, 2019<sup>65</sup></b>   | 2c                    | Intracranial hemorrhage was regarded as symptomatic (sICH) if the NIHSS score increased to $\geq 4$ .                    | 4          | 66               | 10             | 278                  | Aspiration                        |

FPR:First pass revascularization; sICH: symptomatic intracranial hemorrhage.
