# Supplementary material
Source: PubMed Central journal article supplement (PMC9041815)
Supplement: NIHMS1789892-supplement-Supplementary_table_7.pdf [file NIHMS1789892-supplement-Supplementary_table_7.pdf]

**SUPPLEMENTARY TABLE 7. MORTALITY RATE(FPR VS RECANALIZED NON-FPR)**

| <b>AUTHORS, YEAR</b>                                        | <b>FPR<br/>Definition</b> | <b>FPR</b> | <b>FPR-<br/>Total</b> | <b>non-<br/>FPR</b> | <b>non-FPR<br/>Total</b> | <b>thrombectomy<br/>technique</b>     |
|-------------------------------------------------------------|---------------------------|------------|-----------------------|---------------------|--------------------------|---------------------------------------|
| <b>ANADANI ET AL,<br/>2019<sup>11</sup></b>                 | 2b                        | 21         | 178                   | 65                  | 302                      | Aspiration                            |
| <b>ANADANI ET AL,<br/>2019<sup>11</sup></b>                 | 2c                        | 19         | 189                   | 42                  | 156                      | Aspiration                            |
| <b>MOHAMMADEN ET<br/>AL, 2020<sup>67</sup></b>              | 2c                        | 23         | 167                   | 23                  | 113                      | Aspiration and/or Stent-<br>retriever |
| <b>Z Aidat et al,<br/>2018<sup>4</sup></b>                  | 2b                        | 13         | 42                    | 19                  | 64                       | Stent-retriever                       |
| <b>Z Aidat et al,<br/>2018<sup>4</sup></b>                  | 3                         | 13         | 80                    | 11                  | 52                       | Stent-retriever                       |
| <b>TORNEL ET AL,<br/>2019<sup>62</sup></b>                  | 2b                        | 29         | 213                   | 43                  | 246                      | Aspiration                            |
| <b>HUN KANG ET AL,<br/>2019<sup>65</sup></b>                | 2c                        | 2          | 66                    | 11                  | 278                      | Aspiration                            |
| <b>NIKUBASHMAN ET<br/>AL, 2019<sup>61</sup></b>             | 3                         | 11         | 55                    | 18                  | 82                       | Aspiration and/or Stent-<br>retriever |
| <b>DROUARD-DE<br/>ROUSIERS ET AL,<br/>2019<sup>68</sup></b> | 2b                        | 8          | 53                    | 18                  | 38                       | Aspiration and/or Stent-<br>retriever |

FPR=First pass revascularization
