# Supplementary material
Source: PubMed Central journal article supplement (PMC9041815)

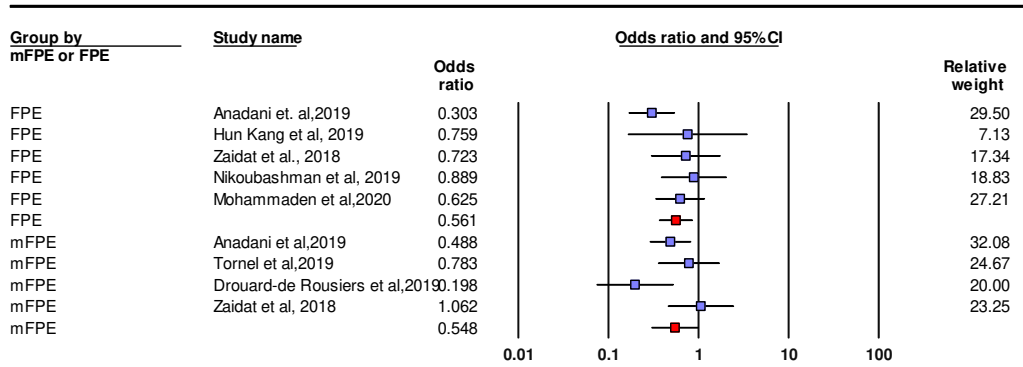

A

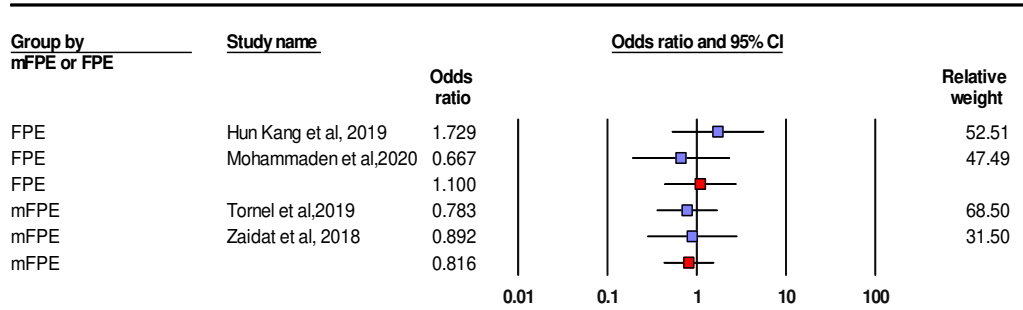

B

Supplementary figure 2) mortality at 90 days (A), sICH (B).

Supplement: NIHMS1789892-supplement-Supplementary__figure_2.pdf [file NIHMS1789892-supplement-Supplementary__figure_2.pdf]

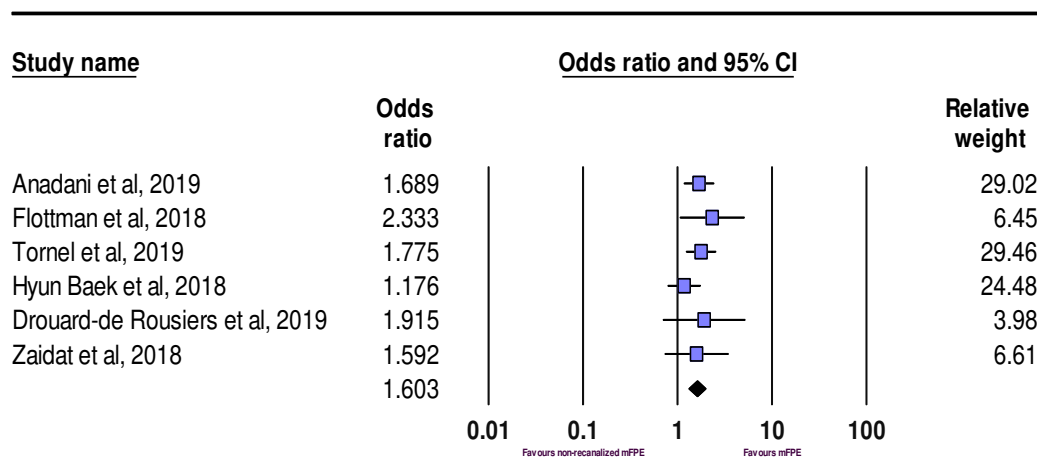

**A**

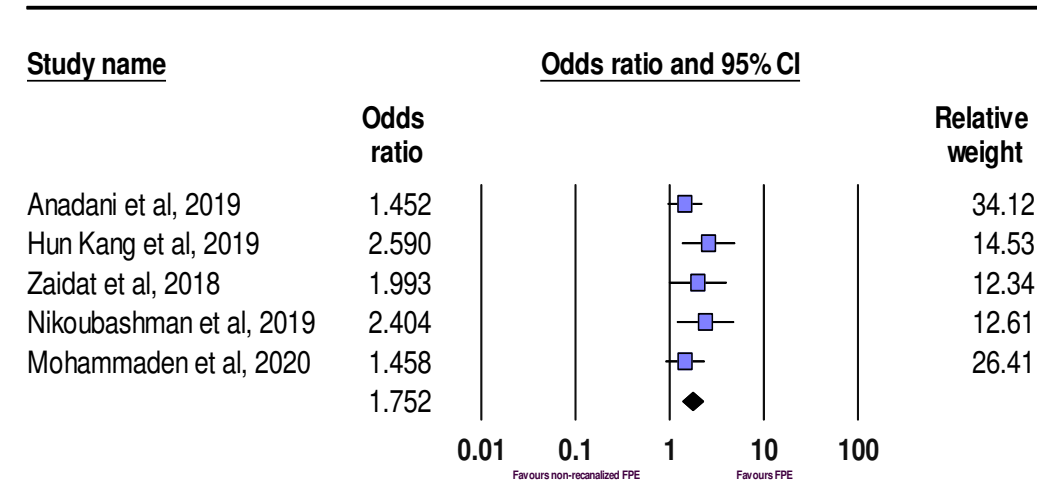

**B**

Supplementay figure 1) mRS (0-2) 90 days for FPE vs non-recanalized FPE (A), mFPE vs non-recanalized mFPE (B).

Supplement: NIHMS1789892-supplement-Supplementary_figure_1.pdf [file NIHMS1789892-supplement-Supplementary_figure_1.pdf]
